# Supplementary material for: Miniature type V-F CRISPR-Cas nucleases enable targeted DNA modification in cells
Source: PubMed Central journal article supplement (PMC8548392; doi:10.1038/s41467-021-26469-4), 2021-10-26
Supplement: 41467_2021_26469_MOESM1_ESM.pdf [file 41467_2021_26469_MOESM1_ESM.pdf]

## Supplementary information

---

- **Supplementary Fig. 1** | SpCas12f1 and AsCas12f1 optimal plasmid DNA cleavage conditions in vitro.
- **Supplementary Fig. 2** | Optimal Cas12f1 gRNA spacer length.
- **Supplementary Fig. 3** | Cas12f1 cleavage of double-stranded DNA targets.
- **Supplementary Fig. 4** | Run-off sequencing of Cas12f1 cleaved plasmid DNA.
- **Supplementary Fig. 5** | Oligoduplex cleavage by Cas12f1 RNP complexes.
- **Supplementary Fig. 6** | ssDNA cleavage by Cas12f1 RNP complexes.
- **Supplementary Fig. 7** | Collateral ssDNA cleavage activity of Cas12f1 RNP complexes.
- **Supplementary Fig. 8** | Temperature dependent dsDNA binding by Cas12f1 RNP complexes.
- **Supplementary Fig. 9** | ds and ssDNA binding activity of Cas12f1 RNP complexes.
- **Supplementary Fig. 10** | Molecular weight measurements of Cas12f1 protein and RNP complexes using mass photometry.
- **Supplementary Fig. 11** | SpCas12f1 genome editing in HEK293T cells.
- **Supplementary Fig. 12** | SpCas12f1 transient editing in *Zea mays* cells.
- **Supplementary Fig. 13** | Overlap of SpCas12f1 and SpCas9 *ms26* and *waxy* targets.
- **Supplementary Table 1** | Plasmids used in this study.
- **Supplementary Table 2** | Sequences of the proteins used in this study.
- **Supplementary Table 3** | RNAs used in this study.
- **Supplementary Table 4** | Oligonucleotides and DNA activators used for different cleavage assays in this study.
- **Supplementary Table 5** | Primers used for human and maize cells genome editing assay.
- **Supplementary Table 6** | gRNA targets used for human and maize cells genome editing.

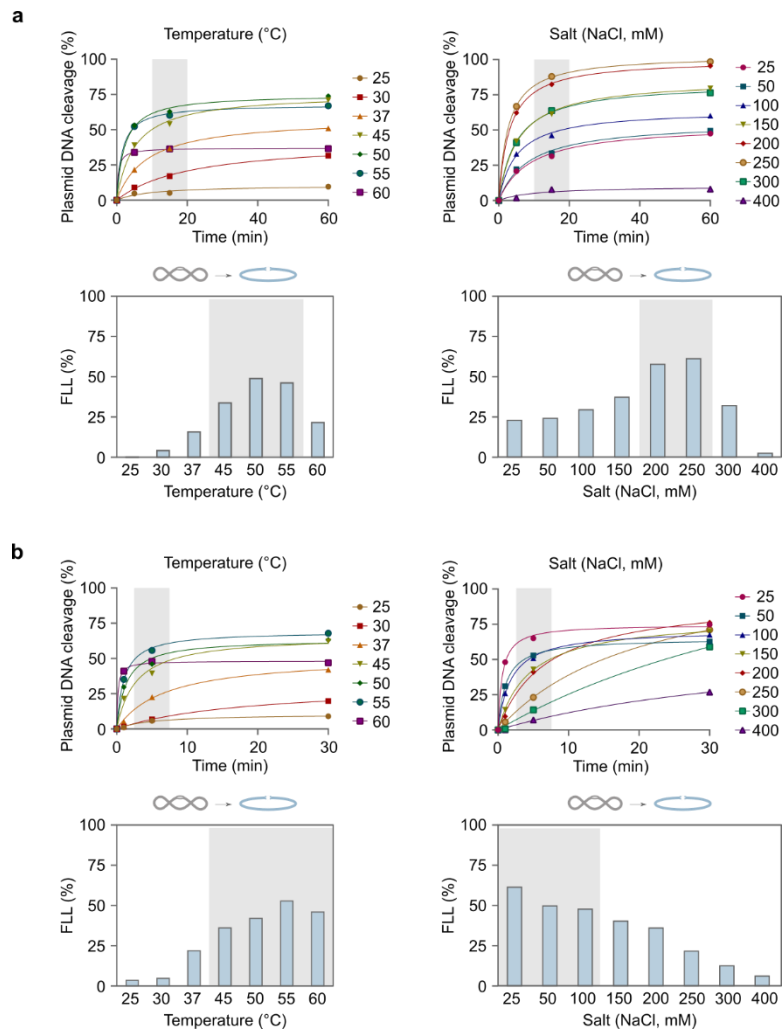

**Supplementary Fig. 1 | SpCas12f1 and AsCas12f1 optimal plasmid DNA cleavage conditions in vitro.** SpCas12f1 (a) and AsCas12f1 (b) RNP plasmid DNA cleavage was assayed by independently varying temperature (with 100 mM NaCl) and NaCl concentration (at 45°C temperature). In the line graphs, grey areas represent the time point used in the histograms to compare the efficiency of full-length linear (FLL) DNA cleavage under the different conditions. The grey areas in the histograms represent the optimal biochemical conditions for Cas12f1 cleavage activity. Cas12f1 RNP complexes were assembled using 20 nt spacer gRNAs.

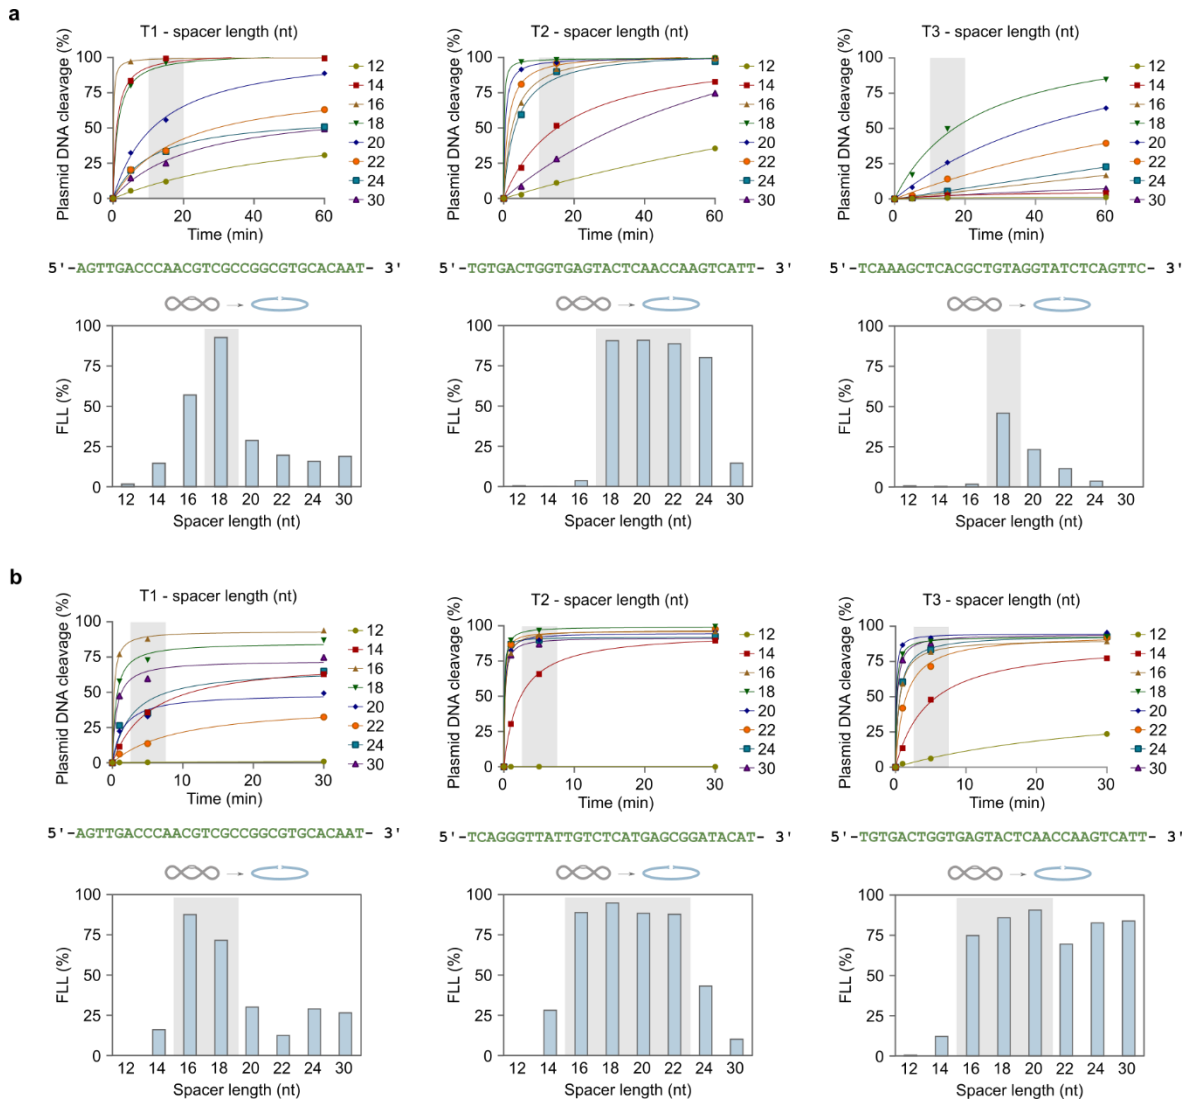

**Supplementary Fig. 2 | Optimal Cas12f1 gRNA spacer length.** SpCas12f1 (a) and AsCas12f1 (b) RNP complexes were assembled and used to assess dsDNA cleavage efficiency for different target sequences. Spacer length was varied from 12 to 30 nt in 2 nt increments for three different protospacer targets (shown in green). Marked grey areas in the line graphs represent the time point used for the corresponding histograms to assess the efficiency of full-length linear (FLL) DNA cleavage. The grey areas in the histograms show the optimal spacer length for each target.

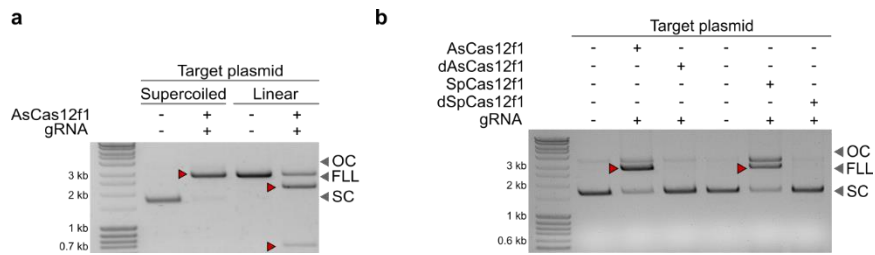

**Supplementary Fig. 3 | Cas12f1 cleavage of double-stranded DNA targets. a**, AsCas12f1 RNP complex efficiently cleaves supercoiled and linear plasmid dsDNA targets. **b**, Alanine substitution of conserved RuvC active site residues (dAsCas12f1 – D225A, dSpCas12f1 – D228A) completely abolishes DNA cleavage activity for both Cas12f1 nucleases. Cas12f1 RNP complexes were assembled using gRNAs with 18 nt spacers. SC, OC, and FLL stand for supercoiled, open-circle, and full-length linear, respectively. Source data are provided as a Source Data file.

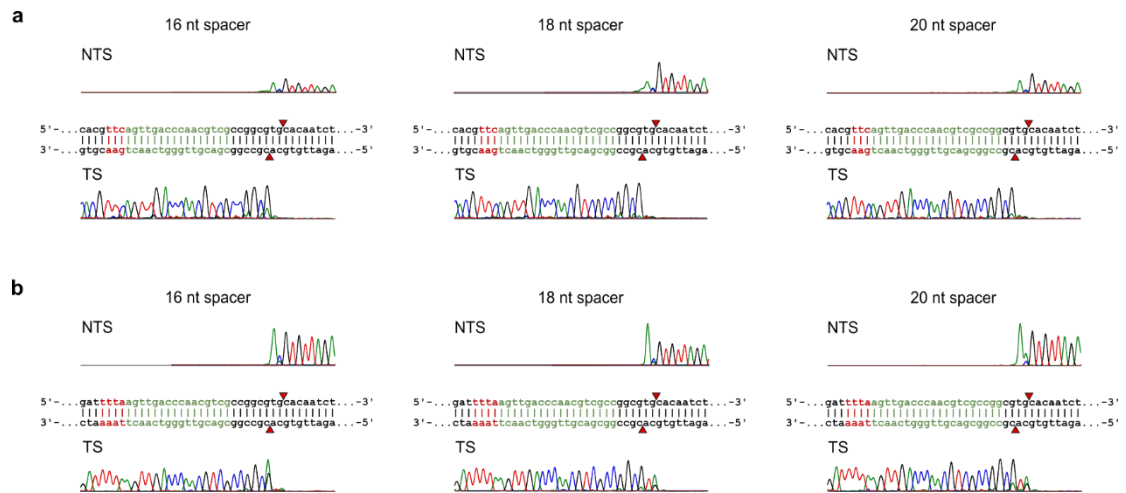

**Supplementary Fig. 4 | Run-off sequencing of Cas12f1 cleaved plasmid DNA.** Plasmid DNA cleavage with SpCas12f1 (**a**) and AsCas12f1 (**b**) RNP complexes resulted in a double-stranded break centered around positions 22-24 bp 3' from the PAM. The cleavage pattern was independent from gRNA spacer length for both Cas12f1 nucleases. NTS and TS represent non-target strand and target strand, respectively. The PAM is represented in red color, while the target sequence is shown in green.

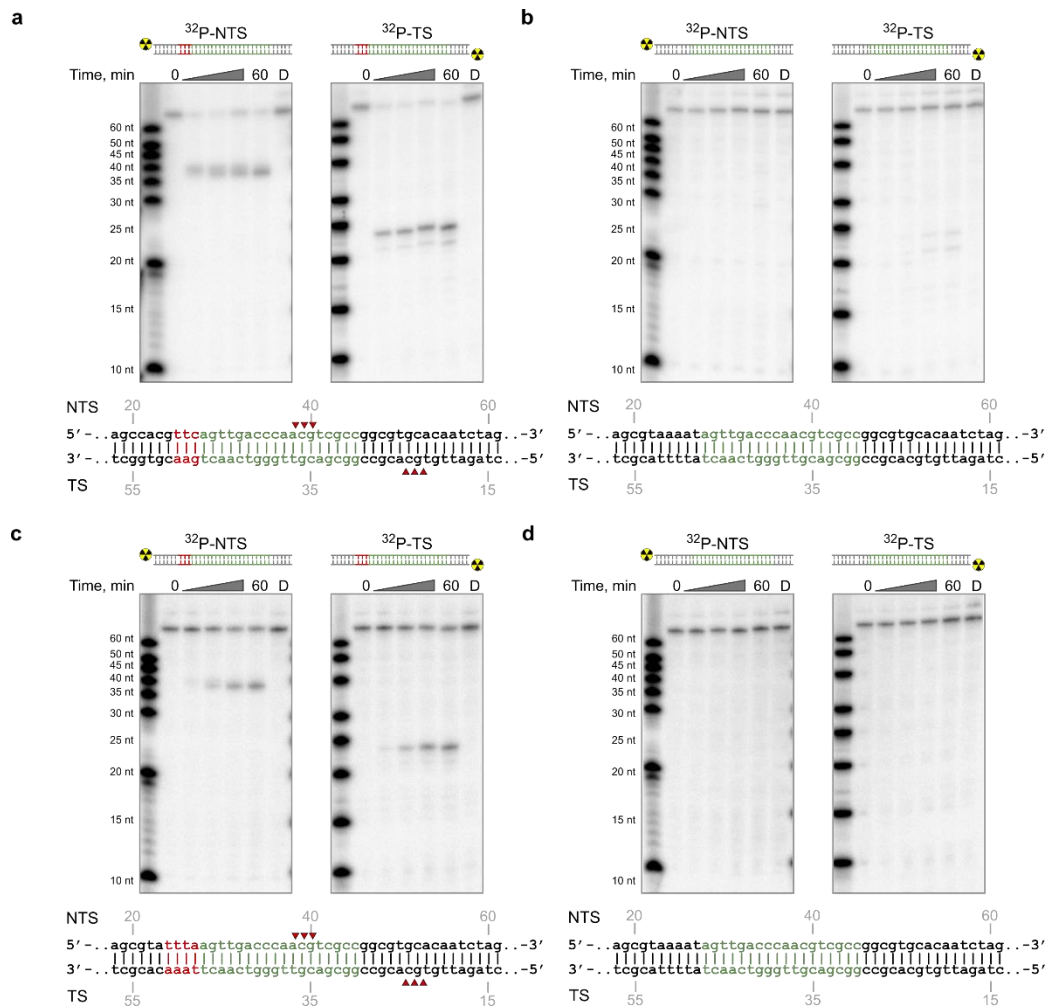

**Supplementary Fig. 5 | Oligoduplex cleavage by Cas12f1 RNP complexes.** Cleavage of radiolabeled dsDNA oligoduplexes by in vitro assembled SpCas12f1 (**a, b**) and AsCas12f1 (**c, d**) RNP complexes. Both Cas12f1 RNP complexes required target sequence (marked in green) and PAM (red) to efficiently cleave dsDNA. Cas12f1 RNP complexes were assembled using 18 nt spacer gRNAs. NTS and TS represent non-target strand and target strand, respectively, D – catalytically dead (d) Cas12f1 RNP complex (dSpCas12f1 – D228A, dAsCas12f1 – D225A), which was incubated with the DNA substrate for 60 min. Source data are provided as a Source Data file.

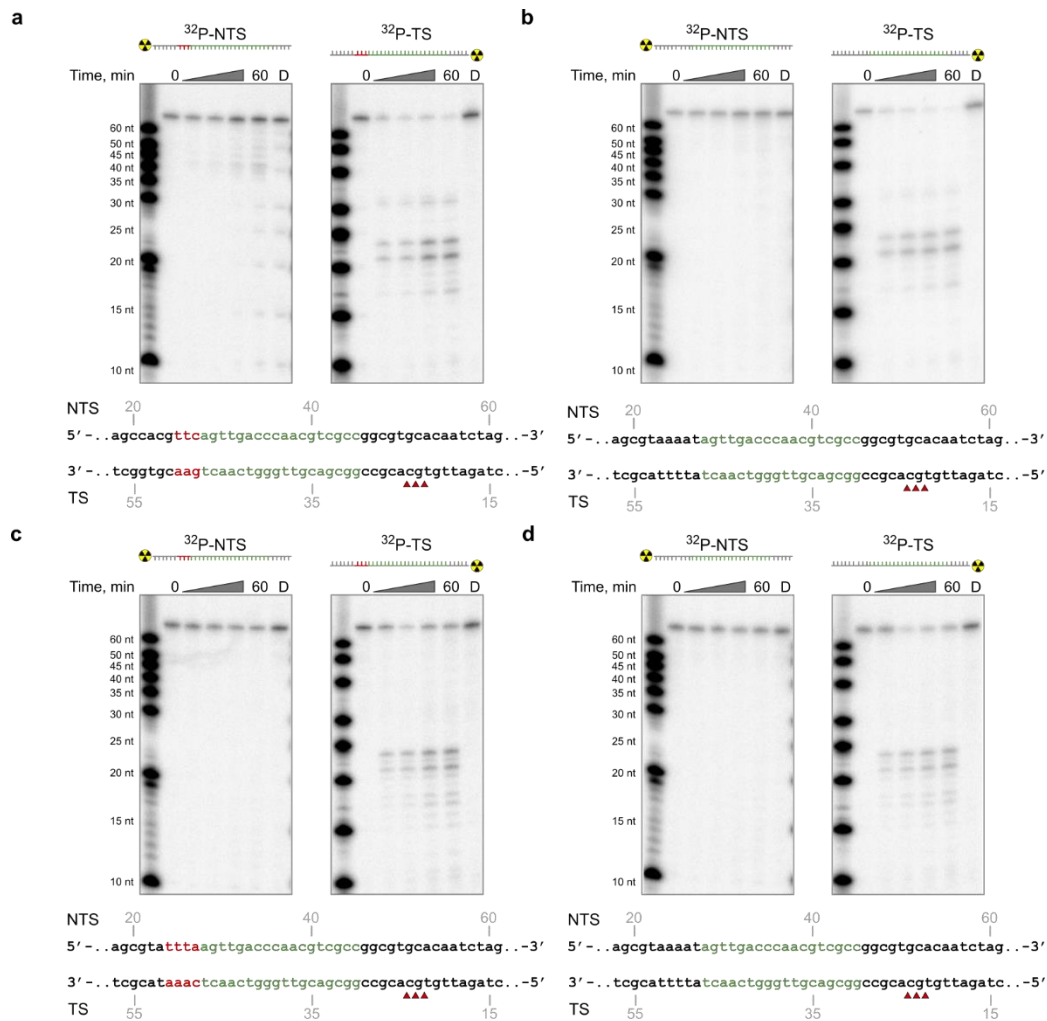

**Supplementary Fig. 6 | ssDNA cleavage by Cas12f1 RNP complexes.** Cleavage of radiolabeled ssDNA by in vitro assembled SpCas12f1 (**a, b**) and AsCas12f1 (**c, d**) RNP complexes. Substrates containing complementary to gRNA sequence (marked in green) were efficiently cleaved in a PAM (red) independent manner. Cas12f1 RNP complexes were assembled using 18 nt spacer gRNAs. NTS and TS represent non-target strand and target strand, respectively, D - dCas12f1 RNP complex (dSpCas12f1 – D228A, dAsCas12f1 – D225A), which was incubated with DNA substrate for 60 min. Source data are provided as a Source Data file.

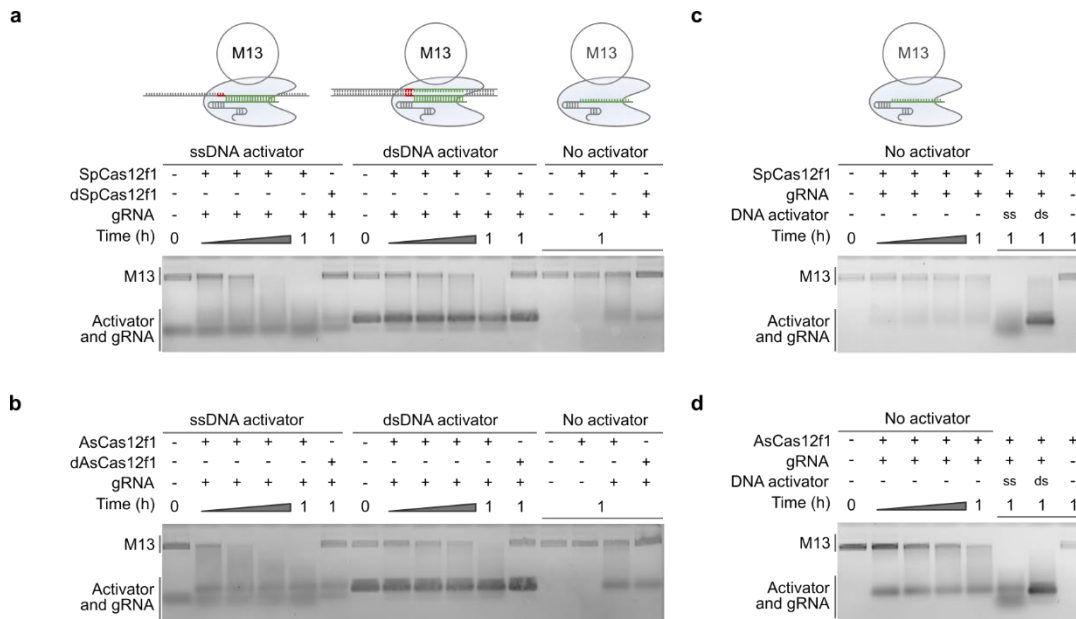

**Supplementary Fig. 7 | Collateral ssDNA cleavage activity of Cas12f1 RNP complexes.** Collateral non-specific M13 ssDNA degradation activity by SpCas12f1 (**a**) and AsCas12f1 (**b**) is triggered by ssDNA or PAM-containing dsDNA targets. As observed for Cas12a (Chen *et al.*, *Science*, 360: 436-439, 2018), slight nuclease activity against non-specific ssDNA can be seen without any DNA activator for SpCas12f1 (**c**) and AsCas12f1 (**d**). dCas12f1 RNP complex (dSpCas12f1 – D228A and dAsCas12f1 – D225A) did not degrade ssDNA. Cas12f1 and dCas12f1 RNP complexes were assembled using gRNAs with 18 nt long spacers. Source data are provided as a Source Data file.



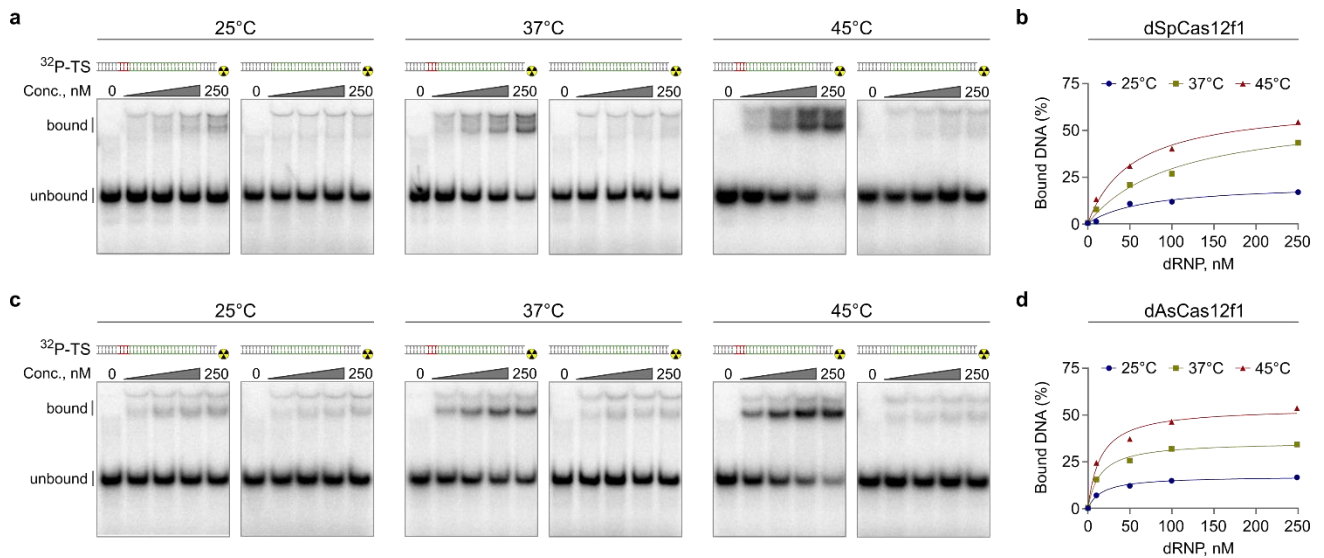

**Supplementary Fig. 8 | Temperature dependent dsDNA binding by Cas12f1 RNP complexes.** dsDNA binding experiment of dSpCas12f1 (D228A) (**a, b**) and dAsCas12f1 (D225A) (**c, d**) RNP complexes. Different amounts of dSpCas12f1 and dAsCas12f1 RNP complexes were pre-incubated with 1 nM of <sup>32</sup>P-5'-labeled dsDNA substrates at the indicated temperatures. Samples were analyzed by non-denaturing PAGE (polyacrylamide gel electrophoresis) at room temperature. Schematic representation of the DNA substrates is shown above the corresponding gel (PAM shown in red color, target in green). dCas12f1 RNP complexes were assembled using gRNAs with 18 nt long spacers. Source data are provided as a Source Data file.

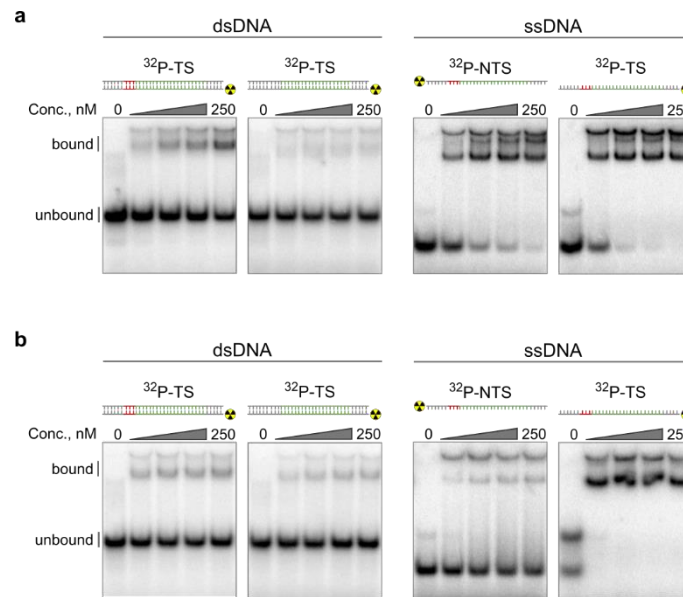

**Supplementary Fig. 9 | ds and ssDNA binding activity of Cas12f1 RNP complexes.** dsDNA and ssDNA binding by dSpCas12f1 (D228A) (**a**) and dAsCas12f1 (D225A) (**b**) RNP complexes. dSpCas12f1 and dAsCas12f1 both preferentially bind PAM containing dsDNA targets. For ssDNA, dAsCas12f1 binds more strongly to the TS (**b**), while dSpCas12f1 binds both TS and NTS with similar affinity (**a**). Different amounts of dSpCas12f1 and dAsCas12f1 RNP complexes were pre-incubated with 1 nM of <sup>32</sup>P-5'-labeled ds or ssDNA substrates at room temperature and analyzed by non-denaturing PAGE (polyacrylamide gel electrophoresis). DNA substrates are shown schematically above the corresponding gel (PAM shown in red color, target in green). NTS and TS represent non-target strand and target strand, respectively. dCas12f1 RNP complexes were assembled using gRNAs with 18 nt long spacers. Source data are provided as a Source Data file.

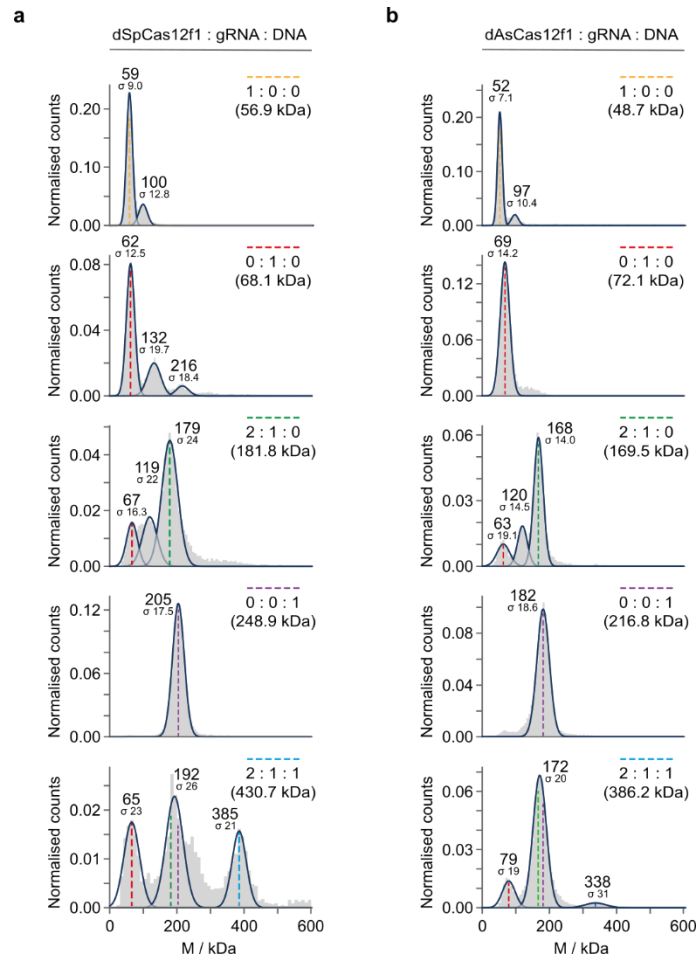

**Supplementary Fig. 10 | Molecular weight measurements of Cas12f1 protein and RNP complexes using mass photometry.** Molecular mass distributions obtained for dSpCas12f1 (D228A) (**a**) and dAsCas12f1 (D225A) (**b**). Colored dashed lines indicate the observed molecular weights for the different components: yellow – dCas12f1, red – gRNA, green – dCas12f1-gRNA binary complex, purple – dsDNA containing specific PAM and target sequences, blue – dCas12f1-gRNA-DNA ternary complex. Theoretical masses of the main species are shown in brackets for the given stoichiometries. dCas12f1 RNP complexes were assembled using gRNAs with 18 nt long spacers.

|                                                     |                     |  |  |
|-----------------------------------------------------|---------------------|--|--|
| <b>VEGFA2</b>                                       |                     |  |  |
| CCCGAGGCGGGGTGAGGGGGTCGGGGCTCGCGGCTCGCACTGAAACTTTT  | Reads#              |  |  |
| CCCGAGGCGGGGTGGA-----GGGGCTCGCGGCTCGCACTGAAACTTTT   | 1132                |  |  |
| CCCGAGGCGGGGTGAGG-----GGGGCTCGCGGCTCGCACTGAAACTTTT  | 904                 |  |  |
| CCCGAGGCGGGGTGAGGG-----GGGGCTCGCGGCTCGCACTGAAACTTTT | 749                 |  |  |
| CCCGAGGCGGGGTGAGGG--TCGGGGTTCGGGGCTCGCACTGAAACTTTT  | 383                 |  |  |
| CCCGAGGCGGGGTGAGGG--TCGGGGTTCGGGGCTCGCACTGAAACTTTT  | 337                 |  |  |
| CCCGAGGCGGGGTGAGGG-----GGGGCTCGCGGCTCGCACTGAAACTTTT | 290                 |  |  |
| CCCGAGGCGGGGTGAGGG-----GGGGCTCGCGGCTCGCACTGAAACTTTT | 67                  |  |  |
| CCCGAGGCGGGGGa-----GGGGCTCGCGGCTCGCACTGAAACTTTT     | 50                  |  |  |
| Total mutations: 3912 (4.43%)                       | Total reads: 88297  |  |  |
| <b>VEGFA3</b>                                       |                     |  |  |
| TCCAAGCCCATTCCTCTTTAGCCAGAGCCGGGTGCAGAGCCAGTCAC     | Reads#              |  |  |
| TCCAAGCCCATTCCTCTTTAGCCAGAGCCGGGT--GCAGAGCCAGTCAC   | 185                 |  |  |
| Total mutations: 185 (0.17%)                        | Total reads: 107719 |  |  |

  

|                                                      |                     |  |  |
|------------------------------------------------------|---------------------|--|--|
| <b>DNMT1</b>                                         |                     |  |  |
| GAGGCAGTGCCTGCTGAGC-CAAATTCACCGAGCAGGAGTGAGGAAACGGC  | Reads#              |  |  |
| GAGGCAGTGCCTGCTGAGC-----CACCGAGCAGGAGTGAGGAAACGGC    | 650                 |  |  |
| GAGGCAGTGCCTGCTGAGC--AAATTCACCGAGCAGGAGTGAGGAAACGGC  | 492                 |  |  |
| GAGGCAGTGCCTGCTGAG-----CACCGAGCAGGAGTGAGGAAACGGC     | 433                 |  |  |
| GAGGCAGTGCCTGCTGAGC--AAATTCACCGAGCAGGAGTGAGGAAACGGC  | 269                 |  |  |
| GAGGCAGTGCCTGCTGAGC--ATTACCGAGCAGGAGTGAGGAAACGGC     | 254                 |  |  |
| GAGGCAGTGCCTGCTGAG-----CACCGAGCAGGAGTGAGGAAACGGC     | 250                 |  |  |
| GAGGCAGTGCCTGCTGAGC-CAAATTCACCGAGCAGGAGTGAGGAAACGGC  | 206                 |  |  |
| GAGGCAGTGCCTGCTGAGC-C-AAATTCACCGAGCAGGAGTGAGGAAACGGC | 199                 |  |  |
| GAGGCAGTGCCTGCTGAG-----TCACCGAGCAGGAGTGAGGAAACGGC    | 145                 |  |  |
| GAGGCAGTGCCTGCTGAG-----TTCACCGAGCAGGAGTGAGGAAACGGC   | 121                 |  |  |
| Total mutations: 3019 (1.38%)                        | Total reads: 218145 |  |  |

**Supplementary Fig. 11 | SpCas12f1 genome editing in HEK293T cells.** HEK293T cells were transfected with DNA expression construct containing SpCas12f1 and gRNA. Amplicon sequencing data yielded indels for three chosen target sites where PAM is marked in red and gRNA target sequence in green. The expected position of cleavage is shaded in red while lowercase nucleotides represent added DNA or insertions.

| <i>ms26</i>                                          |        |        | Sequence reads (%): Trt Ctrl                          |        |        | <i>waxy</i> |  |  | Sequence reads (%): Trt Ctrl |  |  |
|------------------------------------------------------|--------|--------|-------------------------------------------------------|--------|--------|-------------|--|--|------------------------------|--|--|
| CGTCGCCGCTCAAGTTCACGGCGTTCCAGGGGGGCCGAGGATCTGCCTGGG  | 99.51% | 99.97% | CGGCCTTGTTCAGTTCAGAGAAAGCAACCTTCCGTCCTGTAGATGCCCTGGGA | 99.40% | 99.86% |             |  |  |                              |  |  |
| CGTCGCCGCTCAAGTTCACGGCGTT-----GCCGAGGATCTGCCTGGG     | 0.04%  | 0.00%  | CGGCCTTGTTCAGTTCAGAGAAAGC-----GTCCCTGTAGATGCCCTGGGA   | 0.07%  | 0.00%  |             |  |  |                              |  |  |
| CGTCGCCGCTCAAGTTCACGGCGTTCCAG-----GCCGAGGATCTGCCTGGG | 0.04%  | 0.00%  | CGGCCTTGTTCAGTTCAGAGAAAGC-----CCCTGTAGATGCCCTGGGA     | 0.03%  | 0.00%  |             |  |  |                              |  |  |
| CGTCGCCGCTCAAGTTCACGGCGTT-----CCGAGGATCTGCCTGGG      | 0.03%  | 0.00%  | CGGCCTTGTTCAGTTCAGAGAAAGC-----TCCTGTAGATGCCCTGGGA     | 0.03%  | 0.00%  |             |  |  |                              |  |  |
| CGTCGCCGCTCAAGTTCACGGCGTT-----GCCGAGGATCTGCCTGGG     | 0.03%  | 0.00%  | CGGCCTTGTTCAGTTCAGAGAAAGC-----CTGTAGATGCCCTGGGA       | 0.02%  | 0.00%  |             |  |  |                              |  |  |
| CGTCGCCGCTCAAGTTCACGGCG-----GCCGAGGATCTGCCTGGG       | 0.02%  | 0.00%  | CGGCCTTGTTCAGTTCAGAGAAAGC-----CGTCCTGTAGATGCCCTGGGA   | 0.02%  | 0.00%  |             |  |  |                              |  |  |
| CGTCGCCGCTCAAGTTCACGGCGTTCC-----GCCGAGGATCTGCCTGGG   | 0.02%  | 0.00%  | CGGCCTTGTTCAGTTCAGAGAAAGC-----GTCCCTGTAGATGCCCTGGGA   | 0.01%  | 0.00%  |             |  |  |                              |  |  |
| CGTCGCCGCTCAAGTTCACGGCGTT-----CCGAGGATCTGCCTGGG      | 0.02%  | 0.00%  | CGGCCTTGTTCAGTTCAGAGAAAG-----TCCTGTAGATGCCCTGGGA      | 0.01%  | 0.00%  |             |  |  |                              |  |  |
| CGTCGCCGCTCAAGTTCACGG-----CGAGGATCTGCCTGGG           | 0.02%  | 0.00%  | CGGCCTTGTTCAGTTCAGAGAAAGC-----CCCTGTAGATGCCCTGGGA     | 0.01%  | 0.00%  |             |  |  |                              |  |  |
| CGTCGCCGCTCAAGTTCACGGCGTT-----GCCGAGGATCTGCCTGGG     | 0.02%  | 0.00%  | CGGCCTTGTTCAGTTCAGAGAAAG-----CCTGTAGATGCCCTGGGA       | 0.01%  | 0.00%  |             |  |  |                              |  |  |
| CGTCGCCGCTCAAGTTCACGGCGTT-----CGAGGATCTGCCTGGG       | 0.01%  | 0.00%  | CGGCCTTGTTCAGTTCAGAGAAAGC-----TCCTGTAGATGCCCTGGGA     | 0.01%  | 0.00%  |             |  |  |                              |  |  |

**Supplementary Fig. 12 | SpCas12f1 transient editing in *Zea mays* cells.** Alignment of sequence reads shows the presence of insertion or deletion (indel) mutations originating at or spanning the predicted cut-site for both *ms26* and *waxy* targets. The observed indel mutations from the 45°C SpCas12f1 treatments (Trt) weren't identified in control (Ctrl) experiments (where the expression cassette encoding the gRNA was omitted). PAM is shown in red and protospacer target in green. The expected position of cleavage is shaded in red.

|             |                                                                                     |
|-------------|-------------------------------------------------------------------------------------|
| <i>ms26</i> | SpCas12f1 5'-TTCAAGTTCACGGCGTTCCAGGCGGGG-3'<br>SpCas9 5'-AAGTTCACGGCGTTCCAGGCGGG-3' |
| <i>waxy</i> | SpCas12f1 5'-CGCAAAGGTTGCCTTCTGAACTGAA-3'<br>SpCas9 5'-GGCATCTACAGGGACGCAAAGG-3'    |

**Supplementary Fig. 13 | Overlap of SpCas12f1 and SpCas9 *ms26* and *waxy* targets.** The PAM is shown in red and the protospacer target in green. The expected position of cleavage is shaded in red.

**Supplementary Table 1 | Plasmids used in this study.**

| Plasmid name            | Description                                                            | Figures                                    | Link                                                                                                            |
|-------------------------|------------------------------------------------------------------------|--------------------------------------------|-----------------------------------------------------------------------------------------------------------------|
| pMBP-SpCas12f1          | SpCas12f1 expression                                                   | 1B, 2, S1A, S2A, S3B, S4A, S5A, S6A, S7A&C | <a href="https://benchling.com/s/seq-zUwkN19bRbbTxepibRqf">https://benchling.com/s/seq-zUwkN19bRbbTxepibRqf</a> |
| pMBP-AsCas12f1          | AsCas12f1 expression                                                   | 1B, S1B, S2B, S3, S4B, S5B, S6A, S7B&D     | <a href="https://benchling.com/s/seq-xGf89cD2PL7Xob1ir3M4">https://benchling.com/s/seq-xGf89cD2PL7Xob1ir3M4</a> |
| pGB-070                 | SpCas12f1 D228A expression                                             | 2D&E, S3B, S5A, S6A, S7A, S8A&C, S9A, S10A | <a href="https://benchling.com/s/seq-BILfejnI93meTV5EyZY0">https://benchling.com/s/seq-BILfejnI93meTV5EyZY0</a> |
| pGB-069                 | AsCas12f1 D225A expression                                             | S3B, S5B, S6B, S7B, S8B&D, S9B, S10B       | <a href="https://benchling.com/s/seq-67HDmF2WxfEkTSvHk868">https://benchling.com/s/seq-67HDmF2WxfEkTSvHk868</a> |
| pSpCas12f1-pETduet-1    | SpCas12f1 intact locus (T7 expression)                                 | 1B                                         | <a href="https://benchling.com/s/seq-XHumnO4wkaHa2vxa7QKZ">https://benchling.com/s/seq-XHumnO4wkaHa2vxa7QKZ</a> |
| pAsCas12f1-pETduet-1    | AsCas12f1 intact locus (T7 expression)                                 | 1B                                         | <a href="https://benchling.com/s/seq-2bGj5WAhZLmAk8wHEhT">https://benchling.com/s/seq-2bGj5WAhZLmAk8wHEhT</a>   |
| pKP14                   | Target plasmid for SpCas12f1                                           | 2A-C, S1A, S2A, S3B, S4A                   | <a href="https://benchling.com/s/seq-EPL613Wf6V5H0rhREGSL">https://benchling.com/s/seq-EPL613Wf6V5H0rhREGSL</a> |
| pKP12                   | Target plasmid for AsCas12f1                                           | S1B, S2B, S3A&B, S4B                       | <a href="https://benchling.com/s/seq-W6Xc8gCZerTaW3iBdzSr">https://benchling.com/s/seq-W6Xc8gCZerTaW3iBdzSr</a> |
| pRZ-101-AsCas12a-NT     | Plasmid for AsCas12a and non-targeting gRNA expression in human cells  | 3B                                         | <a href="https://benchling.com/s/seq-yDONKunfOfNYLbmY55V">https://benchling.com/s/seq-yDONKunfOfNYLbmY55V</a>   |
| pRZ-162-AsCas12a-VEGFA2 | Plasmid for AsCas12a and VEGFA2 gRNA expression in human cells         | 3B                                         | <a href="https://benchling.com/s/seq-Q5KMPMN4hSv08GwildF5">https://benchling.com/s/seq-Q5KMPMN4hSv08GwildF5</a> |
| pRZ-102-AsCas12a-VEGFA3 | Plasmid for AsCas12a and VEGFA3 gRNA expression in human cells         | 3B                                         | <a href="https://benchling.com/s/seq-flifXrX9hgNIqdA9JLZa">https://benchling.com/s/seq-flifXrX9hgNIqdA9JLZa</a> |
| pRZ-104-AsCas12a-DNMT1  | Plasmid for AsCas12a and DNMT1 gRNA expression in human cells          | 3B                                         | <a href="https://benchling.com/s/seq-zhSFfZLra1QZa8UcPrqE">https://benchling.com/s/seq-zhSFfZLra1QZa8UcPrqE</a> |
| pRZ-105-AsCas12f1-NT    | Plasmid for AsCas12f1 and non-targeting gRNA expression in human cells | 3B                                         | <a href="https://benchling.com/s/seq-YcM3Dnsxs2GipEASEcxO">https://benchling.com/s/seq-YcM3Dnsxs2GipEASEcxO</a> |

|                          |                                                                        |      |                                                                                                                 |
|--------------------------|------------------------------------------------------------------------|------|-----------------------------------------------------------------------------------------------------------------|
| pRZ-107-AsCas12f1-VEFGA2 | Plasmid for AsCas12f1 and VEGFA2 gRNA expression in human cells        | 3B   | <a href="https://benchling.com/s/seq-J9AcGWXwBKYiK2mdxCHp">https://benchling.com/s/seq-J9AcGWXwBKYiK2mdxCHp</a> |
| pRZ-106-AsCas12f1-VEGFA3 | Plasmid for AsCas12f1 and VEGFA3 gRNA expression in human cells        | 3B   | <a href="https://benchling.com/s/seq-pl7JRUBc2XZHogVmgSBP">https://benchling.com/s/seq-pl7JRUBc2XZHogVmgSBP</a> |
| pRZ-108-AsCas12f1-DNMT1  | Plasmid for AsCas12f1 and DNMT1 gRNA expression in human cells         | 3B   | <a href="https://benchling.com/s/seq-TwRn8F0I3Al0jMdrv8ue">https://benchling.com/s/seq-TwRn8F0I3Al0jMdrv8ue</a> |
| pRZ-109-SpCas12f1-NT     | Plasmid for SpCas12f1 and non-targeting gRNA expression in human cells | 3B   | <a href="https://benchling.com/s/seq-BIFo4HyxYmDaTO5B5exo">https://benchling.com/s/seq-BIFo4HyxYmDaTO5B5exo</a> |
| pRZ-111-SpCas12f1-VEGFA2 | Plasmid for SpCas12f1 and VEGFA2 gRNA expression in human cells        | 3B   | <a href="https://benchling.com/s/seq-wT5Z40UW0e19mmw1i2MZ">https://benchling.com/s/seq-wT5Z40UW0e19mmw1i2MZ</a> |
| pRZ-110-SpCas12f1-VEGFA3 | Plasmid for SpCas12f1 and VEGFA3 gRNA expression in human cells        | 3B   | <a href="https://benchling.com/s/seq-RMm93GUclusNgBEsyKWD">https://benchling.com/s/seq-RMm93GUclusNgBEsyKWD</a> |
| pRZ-112-SpCas12f1-DNMT1  | Plasmid for SpCas12f1 and DNMT1 gRNA expression in human cells         | 3B   | <a href="https://benchling.com/s/seq-BZY0Dqhovc7uC7O1Alei">https://benchling.com/s/seq-BZY0Dqhovc7uC7O1Alei</a> |
| RV039055                 | Plasmid for SpCas12f1 protein expression in <i>Zea mays</i>            | 3D-G | <a href="https://benchling.com/s/seq-5x8vhclhUFgBrRIFOAKX">https://benchling.com/s/seq-5x8vhclhUFgBrRIFOAKX</a> |
| RV008870_ms26            | Plasmid for SpCas12f1 ms26 target gRNA expression in <i>Zea mays</i>   | 3D-G | <a href="https://benchling.com/s/seq-ubbCfOYchZrojU6ykpPG">https://benchling.com/s/seq-ubbCfOYchZrojU6ykpPG</a> |
| RV008870_waxy            | Plasmid for SpCas12f1 waxy target gRNA expression in <i>Zea mays</i>   | 3D-G | <a href="https://benchling.com/s/seq-50o7xJeDOiXNghsFFgBs">https://benchling.com/s/seq-50o7xJeDOiXNghsFFgBs</a> |
| RV035712                 | Plasmid for SpCas9 protein expression in <i>Zea mays</i>               | 3E   | <a href="https://benchling.com/s/seq-kFFZb6L5eJZRzquUxU37">https://benchling.com/s/seq-kFFZb6L5eJZRzquUxU37</a> |
| RV008870-Cas9_ms26       | Plasmid for SpCas9 ms26 target gRNA expression in <i>Zea mays</i>      | 3E   | <a href="https://benchling.com/s/seq-6YJqLeddN4YZbvXojTHq">https://benchling.com/s/seq-6YJqLeddN4YZbvXojTHq</a> |
| RV022942                 | Plasmid for SpCas9 waxy target gRNA expression in <i>Zea mays</i>      | 3E   | <a href="https://benchling.com/s/seq-o5RfI59cokCCOZnfXJ0I">https://benchling.com/s/seq-o5RfI59cokCCOZnfXJ0I</a> |



## Supplementary Table 2 | Sequences of the proteins used in this study.

### SpCas12f1

MGESVKAIKLKILDMFLDPECTKQDDNWRKDLSTMSRFCAEAGNMCLRDLYNYFSMPKEDRISSKDLYNAMY  
HKTKLLHPELPGKVANQIVNHAKDVWKRNAKLIYRNQISMPTYKITTAPIRLQNNIYKLIKNNKYIIDVQLYSKE  
YSKDSGKGTHTRYFLVAVRDSSSTRMIFDRIMSKDHIDSSKSYTQGGQLQIKKDHQGKWYCIIPYTFPTHETVLDPD  
KVMGVDLGVAKAVYWAFNSSYKRGCIDGGEIEHFRKMIRARRVSIQNQIKHSGDARKGHGRKRALKPIETLSE  
KEKNFRDTINHRYANRIVEAAIKQCGGTIQIENLEGIADTTGSKFLKNWPYYDLQTKIVNKAKEHGITVVAINPQY  
TSQRCSMCGYIEKTNRSSQAVFECKQCGYGSRTICINCRHVQVSGDVCEECGGIVKKENVNADYNAAKNIST  
PYIDQIIMEKCLELGIPYRSITCKEKGHIQASGNTCEVCGSTNILKPKKIRKAK\*

### 10×His:MBP:TEV:SpCas12f1

MKSSHHHHHHHHHHGGSSMKIEEGKLVWINGDKGYNGLAEVGGKFEKDTGIKVTVEHPDKLEEKFPQVAATG  
DGPDIIFWAHDRFGGYAQSGLLAEITPKAFQDKLYPFTWDAVRYNGKLIAYPIAVEALS LIYNKDLLPNPPKT  
WEEIPALDKELKAKGKSALMFNLQEPYFTWPLIAADGGYAFKYENGGYDIKDVGVNAGAKAGLTFVLDLIKN  
KHMNADTDYSIAEAAFNKGETAMTINGPWAWSNIDTSKVNIGVTVLPTFKGQPSKPFVGVLSAGINAASPNKE  
LAKEFLENYLLTDEGLEAVNKDKPLGAVALKS YEEELAKDPRIATMENAQKGEIMPNIQMSAFWYAVRTAVI  
NAASGRQTVDEALKDAQTNSSSNNNNNNNNNNLGIEENLYFQSNAMGESVKAIKLKILDMFLDPECTKQDDN  
WRKDLSTMSRFCAEAGNMCLRDLYNYFSMPKEDRISSKDLYNAMYHKTKLLHPELPGKVANQIVNHAKDVW  
KRNAKLIYRNQISMPTYKITTAPIRLQNNIYKLIKNNKYIIDVQLYSKEYSKDSGKGTHTRYFLVAVRDSSSTRMIF  
DRIMSKDHIDSSKSYTQGGQLQIKKDHQGKWYCIIPYTFPTHETVLDPDKVMGVDLGVAKAVYWAFNSSYKRG  
CIDGGEIEHFRKMIRARRVSIQNQIKHSGDARKGHGRKRALKPIETLSEKEKNFRDTINHRYANRIVEAAIKQGC  
GTIQIENLEGIADTTGSKFLKNWPYYDLQTKIVNKAKEHGITVVAINPQYTSQRCSMCGYIEKTNRSSQAVFEC  
KQCGYGSRTICINCRHVQVSGDVCEECGGIVKKENVNADYNAAKNISTPYIDQIIMEKCLELGIPYRSITCKEKG  
HIQASGNTCEVCGSTNILKPKKIRKAK\*

### AsCas12f1

MIKVYRYEIVKPLDLDWKEFGTILRQLQQETRFALNKATQLAWEWWMGFSSDYKDNHGEYPKSKDILGYTNVH  
GYAYHTIKTKAYRLNSGNLSQTIKRATDRFKAYQKEILRGDMSIPSYKRDIPDLIKENISVNRMNHGDIASLSL  
LSNPAKQEMNVKRKISVIVRGAGKTIMDRILSGEYQVSASQIIHDDRKNKWYLNISYDFEPQTRVLDLNKIMGI  
DLGVAVAVYMAFQHTPARYKLEGGEIENFRRQVESRRISMLRQGGKYAGGARGGHGRDKRIKPIEQLRDKIAN  
FRDTTNRHYSRYIVDMAIKEGCGTIQMEDLTNIRDIGSRFLQNWYTYDLQKQIIYKAEAEAGIKVIKIDPQYTSQRC  
SECGNIDSGNRIGQAIFKCRACGYEANADYNAARNIAIPNIDKIIAESIK\*

### 10×His:MBP:TEV:AsCas12f1

MKSSHHHHHHHHHHGGSSMKIEEGKLVWINGDKGYNGLAEVGGKFEKDTGIKVTVEHPDKLEEKFPQVAATG  
DGPDIIFWAHDRFGGYAQSGLLAEITPKAFQDKLYPFTWDAVRYNGKLIAYPIAVEALS LIYNKDLLPNPPKT  
WEEIPALDKELKAKGKSALMFNLQEPYFTWPLIAADGGYAFKYENGGYDIKDVGVNAGAKAGLTFVLDLIKN  
KHMNADTDYSIAEAAFNKGETAMTINGPWAWSNIDTSKVNIGVTVLPTFKGQPSKPFVGVLSAGINAASPNKE  
LAKEFLENYLLTDEGLEAVNKDKPLGAVALKS YEEELAKDPRIATMENAQKGEIMPNIQMSAFWYAVRTAVI  
NAASGRQTVDEALKDAQTNSSSNNNNNNNNNNLGIEENLYFQSNAMIKVYRYEIVKPLDLDWKEFGTILRQLQ  
QETRFALNKATQLAWEWWMGFSSDYKDNHGEYPKSKDILGYTNVHGYAYHTIKTKAYRLNSGNLSQTIKRATD  
RFKAYQKEILRGDMSIPSYKRDIPDLIKENISVNRMNHGDIASLSL NPAKQEMNVKRKISVIVRGAGKTIM  
DRILSGEYQVSASQIIHDDRKNKWYLNISYDFEPQTRVLDLNKIMGIDLGVAVAVYMAFQHTPARYKLEGGEIE  
NFRRQVESRRISMLRQGGKYAGGARGGHGRDKRIKPIEQLRDKIANFRDTTNRHYSRYIVDMAIKEGCGTIQME  
DLTNIRDIGSRFLQNWYTYDLQKQIIYKAEAEAGIKVIKIDPQYTSQRCSECGNIDSGNRIGQAIFKCRACGYEAN  
ADYNAARNIAIPNIDKIIAESIK\*

**Supplementary Table 3 | RNAs used in this study.**

| Target           | Spacer, nt | Sequence 5'-3' (Target)                                                                                                                                                                                                                    | Figures                                                                    |
|------------------|------------|--------------------------------------------------------------------------------------------------------------------------------------------------------------------------------------------------------------------------------------------|----------------------------------------------------------------------------|
| <b>SpCas12f1</b> |            |                                                                                                                                                                                                                                            |                                                                            |
| T1               | 12         | GGGAUUUACUCUGUUUCGCGCGCCAGGGCAGUUAGGUGCCC<br>UAAAAGAGCGAAGUGGCCGAAAGGAAAGGCUAACGCUUCUCU<br>AACGCUACGGCGACCUUGGCGAAAUGCCAUCAAUACCACGC<br>GGCCCGAAAGGGUUCGCGCGAAACUGAGUAAUGAAAGUCGC<br>AUCUUGCGUAAGCGCGUGGAUUGAAACAGUUGACCCAAC               | 2A, S2A                                                                    |
|                  | 14         | GGGAUUUACUCUGUUUCGCGCGCCAGGGCAGUUAGGUGCCC<br>UAAAAGAGCGAAGUGGCCGAAAGGAAAGGCUAACGCUUCUCU<br>AACGCUACGGCGACCUUGGCGAAAUGCCAUCAAUACCACGC<br>GGCCCGAAAGGGUUCGCGCGAAACUGAGUAAUGAAAGUCGC<br>AUCUUGCGUAAGCGCGUGGAUUGAAACAGUUGACCCAACGU             | 2A, S2A                                                                    |
|                  | 16         | GGGAUUUACUCUGUUUCGCGCGCCAGGGCAGUUAGGUGCCC<br>UAAAAGAGCGAAGUGGCCGAAAGGAAAGGCUAACGCUUCUCU<br>AACGCUACGGCGACCUUGGCGAAAUGCCAUCAAUACCACGC<br>GGCCCGAAAGGGUUCGCGCGAAACUGAGUAAUGAAAGUCGC<br>AUCUUGCGUAAGCGCGUGGAUUGAAACAGUUGACCCAACGU<br>CG       | 2A, S2A,<br>S4A                                                            |
|                  | 18         | GGGAUUUACUCUGUUUCGCGCGCCAGGGCAGUUAGGUGCCC<br>UAAAAGAGCGAAGUGGCCGAAAGGAAAGGCUAACGCUUCUCU<br>AACGCUACGGCGACCUUGGCGAAAUGCCAUCAAUACCACGC<br>GGCCCGAAAGGGUUCGCGCGAAACUGAGUAAUGAAAGUCGC<br>AUCUUGCGUAAGCGCGUGGAUUGAAACAGUUGACCCAACGU<br>CGCC     | 2, S1A,<br>S2A, S3B,<br>S4A, S5A,<br>S6A,<br>S7A&C,<br>S8A&C,<br>S9A, S10A |
|                  | 20         | GGGAUUUACUCUGUUUCGCGCGCCAGGGCAGUUAGGUGCCC<br>UAAAAGAGCGAAGUGGCCGAAAGGAAAGGCUAACGCUUCUCU<br>AACGCUACGGCGACCUUGGCGAAAUGCCAUCAAUACCACGC<br>GGCCCGAAAGGGUUCGCGCGAAACUGAGUAAUGAAAGUCGC<br>AUCUUGCGUAAGCGCGUGGAUUGAAACAGUUGACCCAACGU<br>CGCCGG   | 2A, S2A,<br>S4A                                                            |
|                  | 22         | GGGAUUUACUCUGUUUCGCGCGCCAGGGCAGUUAGGUGCCC<br>UAAAAGAGCGAAGUGGCCGAAAGGAAAGGCUAACGCUUCUCU<br>AACGCUACGGCGACCUUGGCGAAAUGCCAUCAAUACCACGC<br>GGCCCGAAAGGGUUCGCGCGAAACUGAGUAAUGAAAGUCGC<br>AUCUUGCGUAAGCGCGUGGAUUGAAACAGUUGACCCAACGU<br>CGCCGGCG | 2A, S2A                                                                    |
|                  | 24         | GGGAUUUACUCUGUUUCGCGCGCCAGGGCAGUUAGGUGCCC<br>UAAAAGAGCGAAGUGGCCGAAAGGAAAGGCUAACGCUUCUCU<br>AACGCUACGGCGACCUUGGCGAAAUGCCAUCAAUACCACGC<br>GGCCCGAAAGGGUUCGCGCGAAACUGAGUAAUGAAAGUCGC                                                          | 2A, S2A                                                                    |

|                  |                                         |                                                                                                                                                                                                                                                      |                                                                     |
|------------------|-----------------------------------------|------------------------------------------------------------------------------------------------------------------------------------------------------------------------------------------------------------------------------------------------------|---------------------------------------------------------------------|
|                  |                                         | AUCUUGCGUAAGCGCGUGGAUUGAAACAGUUGACCCAACGU<br>CGCCGGCGUG                                                                                                                                                                                              |                                                                     |
|                  | 30                                      | GGGAUUUACUCUGUUUCGCGCGCCAGGGCAGUUAGGUGCCC<br>UAAAAGAGCGAAGUGGCCGAAAGGAAAGGCUAACGCUUCUCU<br>AACGCUACGGCGACCUUGGCCGAAAUGCCAUCAAUACCACGC<br>GGCCCGAAAGGGUUCGCGCGAAACUGAGUAAUGAAAGUCGC<br>AUCUUGCGUAAGCGCGUGGAUUGAAACAGUUGACCCAACGU<br>CGCCGGCGUGCACA AU | 2A, S2A                                                             |
| T2               | 12, 14,<br>16, 18,<br>20, 22,<br>24, 30 | GGGAUUUACUCUGUUUCGCGCGCCAGGGCAGUUAGGUGCCC<br>UAAAAGAGCGAAGUGGCCGAAAGGAAAGGCUAACGCUUCUCU<br>AACGCUACGGCGACCUUGGCCGAAAUGCCAUCAAUACCACGC<br>GGCCCGAAAGGGUUCGCGCGAAACUGAGUAAUGAAAGUCGC<br>AUCUUGCGUAAGCGCGUGGAUUGAAACUGUGACUGGUGAGU<br>ACUCAACCAAGUCAUU  | S2A                                                                 |
| T3               | 12, 14,<br>16, 18,<br>20, 22,<br>24, 30 | GGGAUUUACUCUGUUUCGCGCGCCAGGGCAGUUAGGUGCCC<br>UAAAAGAGCGAAGUGGCCGAAAGGAAAGGCUAACGCUUCUCU<br>AACGCUACGGCGACCUUGGCCGAAAUGCCAUCAAUACCACGC<br>GGCCCGAAAGGGUUCGCGCGAAACUGAGUAAUGAAAGUCGC<br>AUCUUGCGUAAGCGCGUGGAUUGAAACUCAAGCUCACGCU<br>GUAGGUAUCUCAGUUC   | S2A                                                                 |
| <b>AsCas12f1</b> |                                         |                                                                                                                                                                                                                                                      |                                                                     |
| T1               | 12                                      | GGGAUACUUCUAUUCGUCGGUUCAGCGACGAUAAGCCGAGA<br>AGUGCCAAUAAAACUGUUAAGUGGUUUGGUAACGCUCGGUA<br>AGGUAGCCAAAAGGCUGAAACUCCGUGCACAAAGACCGCACG<br>GACGCUUCACAUUAGCUCAUAAACAAAUGUCGUCGACCUCU<br>AAUAGCGAAAGUUUGCGAGCUAGCUUGUGGAGUGUGAACAG<br>UUGACCCAAC         | S2B                                                                 |
|                  | 14                                      | GGGAUACUUCUAUUCGUCGGUUCAGCGACGAUAAGCCGAGA<br>AGUGCCAAUAAAACUGUUAAGUGGUUUGGUAACGCUCGGUA<br>AGGUAGCCAAAAGGCUGAAACUCCGUGCACAAAGACCGCACG<br>GACGCUUCACAUUAGCUCAUAAACAAAUGUCGUCGACCUCU<br>AAUAGCGAAAGUUUGCGAGCUAGCUUGUGGAGUGUGAACAG<br>UUGACCCAACGU       | S2B                                                                 |
|                  | 16                                      | GGGAUACUUCUAUUCGUCGGUUCAGCGACGAUAAGCCGAGA<br>AGUGCCAAUAAAACUGUUAAGUGGUUUGGUAACGCUCGGUA<br>AGGUAGCCAAAAGGCUGAAACUCCGUGCACAAAGACCGCACG<br>GACGCUUCACAUUAGCUCAUAAACAAAUGUCGUCGACCUCU<br>AAUAGCGAAAGUUUGCGAGCUAGCUUGUGGAGUGUGAACAG<br>UUGACCCAACGUCG     | S2B, S4B                                                            |
|                  | 18                                      | GGGAUACUUCUAUUCGUCGGUUCAGCGACGAUAAGCCGAGA<br>AGUGCCAAUAAAACUGUUAAGUGGUUUGGUAACGCUCGGUA<br>AGGUAGCCAAAAGGCUGAAACUCCGUGCACAAAGACCGCACG<br>GACGCUUCACAUUAGCUCAUAAACAAAUGUCGUCGACCUCU<br>AAUAGCGAAAGUUUGCGAGCUAGCUUGUGGAGUGUGAACAG<br>UUGACCCAACGUCGCC   | S1B, S2B,<br>S3, S4B,<br>S5B, S6B,<br>S7B&D,<br>S8B&D,<br>S9B, S10B |

|    |                                         |                                                                                                                                                                                                                                                                       |          |
|----|-----------------------------------------|-----------------------------------------------------------------------------------------------------------------------------------------------------------------------------------------------------------------------------------------------------------------------|----------|
|    | 20                                      | GGGAUACUUCUAUUCGUCGGUUCAGCGACGAUAAGCCGAGA<br>AGUGCCAAUAAAACUGUUAAGUGGUUUGGUAACGCUCGGUA<br>AGGUAGCCAAAAGGCUGAAACUCCGUGCACAAAGACCGCACG<br>GACGCUUCACAUUAGCUCAUAAACAAAUGUCGUCGACCUCU<br>AAUAGCGAAAGUUUGCGAGCUAGCUUGUGGAGUGUGAACAG<br><u>UUGACCCAACGUCGCCGG</u>           | S2B, S4B |
|    | 22                                      | GGGAUACUUCUAUUCGUCGGUUCAGCGACGAUAAGCCGAGA<br>AGUGCCAAUAAAACUGUUAAGUGGUUUGGUAACGCUCGGUA<br>AGGUAGCCAAAAGGCUGAAACUCCGUGCACAAAGACCGCACG<br>GACGCUUCACAUUAGCUCAUAAACAAAUGUCGUCGACCUCU<br>AAUAGCGAAAGUUUGCGAGCUAGCUUGUGGAGUGUGAACAG<br><u>UUGACCCAACGUCGCCGGCG</u>         | S2B      |
|    | 24                                      | GGGAUACUUCUAUUCGUCGGUUCAGCGACGAUAAGCCGAGA<br>AGUGCCAAUAAAACUGUUAAGUGGUUUGGUAACGCUCGGUA<br>AGGUAGCCAAAAGGCUGAAACUCCGUGCACAAAGACCGCACG<br>GACGCUUCACAUUAGCUCAUAAACAAAUGUCGUCGACCUCU<br>AAUAGCGAAAGUUUGCGAGCUAGCUUGUGGAGUGUGAACAG<br><u>UUGACCCAACGUCGCCGGCGUG</u>       | S2B      |
|    | 30                                      | GGGAUACUUCUAUUCGUCGGUUCAGCGACGAUAAGCCGAGA<br>AGUGCCAAUAAAACUGUUAAGUGGUUUGGUAACGCUCGGUA<br>AGGUAGCCAAAAGGCUGAAACUCCGUGCACAAAGACCGCACG<br>GACGCUUCACAUUAGCUCAUAAACAAAUGUCGUCGACCUCU<br>AAUAGCGAAAGUUUGCGAGCUAGCUUGUGGAGUGUGAACAG<br><u>UUGACCCAACGUCGCCGGCGUGCACAAU</u> | S2B      |
| T2 | 12, 14,<br>16, 18,<br>20, 22,<br>24, 30 | GGGAUACUUCUAUUCGUCGGUUCAGCGACGAUAAGCCGAGA<br>AGUGCCAAUAAAACUGUUAAGUGGUUUGGUAACGCUCGGUA<br>AGGUAGCCAAAAGGCUGAAACUCCGUGCACAAAGACCGCACG<br>GACGCUUCACAUUAGCUCAUAAACAAAUGUCGUCGACCUCU<br>AAUAGCGAAAGUUUGCGAGCUAGCUUGUGGAGUGUGAACUC<br><u>AGGGUUAUUGUCUCAUGAGCGGAUACAU</u> | S2B      |
| T3 | 12, 14,<br>16, 18,<br>20, 22,<br>24, 30 | GGGAUACUUCUAUUCGUCGGUUCAGCGACGAUAAGCCGAGA<br>AGUGCCAAUAAAACUGUUAAGUGGUUUGGUAACGCUCGGUA<br>AGGUAGCCAAAAGGCUGAAACUCCGUGCACAAAGACCGCACG<br>GACGCUUCACAUUAGCUCAUAAACAAAUGUCGUCGACCUCU<br>AAUAGCGAAAGUUUGCGAGCUAGCUUGUGGAGUGUGAACUG<br><u>CUUCCGGCUCGUUUGUUGUGGAAUUG</u>   | S2B      |

**Supplementary Table 4 | Oligonucleotides and DNA activators used for different cleavage assays in this study.**

| Description                       | Sequence 5'-3' (PAM, Target)                                                                     | Figures                 |
|-----------------------------------|--------------------------------------------------------------------------------------------------|-------------------------|
| Target (forward)<br>for SpCas12f1 | GCACCTTACTGCAAGGTAGCCACG <b>TTCAGTTGACCCAACGTCG</b><br>CCGGCGTGCACAATCTAGATGCATCAGCTGC           | S5A, S6A,<br>S8A&C, S9A |
| Target (reverse)<br>for SpCas12f1 | GCAGCTGATGCATCTAGATTGTGCACGCC <b>GGCGACGTTGGGT</b><br>CAACT <b>GAA</b> CGTGGCTACCTTGCAGTAAGGTGC  | S5A, S6A,<br>S8A&C, S9A |
| Target (forward)<br>for AsCas12f1 | GCACCTTACTGCAAGGTAGCGT <b>TTTAAGTTGACCCAACGTCG</b><br>CCGGCGTGCACAATCTAGATGCATCAGCTGC            | S5B, S6B,<br>S8B&D, S9B |
| Target (reverse)<br>for AsCas12f1 | GCAGCTGATGCATCTAGATTGTGCACGCC <b>GGCGACGTTGGGT</b><br>CAACT <b>TAA</b> TACGCTACCTTGCAGTAAGGTGC   | S5B, S6B,<br>S8B&D, S9B |
| Control target<br>(forward)       | GCACCTTACTGCAAGGTAGCGTAA <b>ATAGTTGACCCAACGTCG</b><br>CCGGCGTGCACAATCTAGATGCATCAGCTGC            | S5, S6, S9              |
| Control target<br>(reverse)       | GCAGCTGATGCATCTAGATTGTGCACGCC <b>GGCGACGTTGGGT</b><br>CAACT <b>ATTTT</b> TACGCTACCTTGCAGTAAGGTGC | S5, S6, S9              |
| Forward strand<br>marker          | GCACCTTACTGCAAGGTAGCGT <b>ATTTAAGTTGACCCAACGTCG</b><br>CCGGCGTGCACAATCTA                         | S5, S6                  |
|                                   | GCACCTTACTGCAAGGTAGCGT <b>ATTTAAGTTGACCCAACGTCG</b><br>CCGGCGT                                   |                         |
|                                   | GCACCTTACTGCAAGGTAGCGT <b>ATTTAAGTTGACCCAACGTCG</b><br>CC                                        |                         |
|                                   | GCACCTTACTGCAAGGTAGCGT <b>ATTTAAGTTGACCCAACG</b>                                                 |                         |
|                                   | GCACCTTACTGCAAGGTAGCGT <b>ATTTAAGTTGACC</b>                                                      |                         |
|                                   | GCACCTTACTGCAAGGTAGCGT <b>ATTTAAGT</b>                                                           |                         |
|                                   | GCACCTTACTGCAAGGTAGC                                                                             |                         |
|                                   | GCACCTTACT                                                                                       |                         |
| Reverse strand<br>marker          | GCAGCTGATGCATCTAGATTGTGCACGCC <b>GGCGACGTTGGGT</b><br>CAACT <b>TAA</b> TACGCTACC                 | S5, S6                  |
|                                   | GCAGCTGATGCATCTAGATTGTGCACGCC <b>GGCGACGTTGGGT</b><br>CAACT <b>TAA</b>                           |                         |
|                                   | GCAGCTGATGCATCTAGATTGTGCACGCC <b>GGCGACGTTGG</b>                                                 |                         |
|                                   | GCAGCTGATGCATCTAGATTGTGCACGCC <b>G</b>                                                           |                         |
|                                   | GCAGCTGATGCATCTAGATTGT <b>GCA</b>                                                                |                         |
|                                   | GCAGCTGATGCATCTAGATT                                                                             |                         |

|                                                |                                                                                                                                                                                                                                                                                                                                                                                                                                                       |          |
|------------------------------------------------|-------------------------------------------------------------------------------------------------------------------------------------------------------------------------------------------------------------------------------------------------------------------------------------------------------------------------------------------------------------------------------------------------------------------------------------------------------|----------|
|                                                | GCAGCTGATGCATCT                                                                                                                                                                                                                                                                                                                                                                                                                                       |          |
|                                                | GCAGCTGATG                                                                                                                                                                                                                                                                                                                                                                                                                                            |          |
| ssDNA activator for SpCas12f1                  | GCAGCTGATGCATCTAGATTGTGCACGCCGGCGACGTTGGGT<br>CAACTGAACGTGGCTACCTTGCAGTAAGGTGC                                                                                                                                                                                                                                                                                                                                                                        | S7A&C    |
| dsDNA activator for SpCas12f1                  | GCCAGGGTTTTCCAGTCACGACGTTGTAAAACGACGGCCAGT<br>GCCAAGCTTGCATGCCTGCAGGTCAATTCCACGTTAGTTGAC<br>CCAACGTCGCCGGCGTGCACAATCTAGATGCTAGGACTCTAGA<br>GGATCCCCGGGTACCGAGCTCGAATTTCGTAATCATGGTCATAG<br>CTGTTTCCTGTGTGAAATTGTTATCCGCTCACAATTCCACACAA<br>CATACGAGCCGGAAGCATAAAGTGTAAGCCTGGGGTGCCTA<br>ATGAGTGAGCTAACTCACATTAATTGCGTTGCGCTCACTGCC<br>GCTTCCAGTCGGGAAACCTGTCGTGCCAGCTGCATTAATGAA<br>TCGGCCAACGCGCGGGGAGAGGCGGTTTGCGTATTGGGCGC<br>TCTTCCGCTTCCTCGC     | S7A&C    |
| ssDNA activator for AsCas12f1                  | GCAGCTGATGCATCTAGATTGTGCACGCCGGCGACGTTGGGT<br>CAACTTAAATACGCTACCTTGCAGTAAGGTGC                                                                                                                                                                                                                                                                                                                                                                        | S7B&D    |
| dsDNA activator for AsCas12f1                  | GCCAGGGTTTTCCAGTCACGACGTTGTAAAACGACGGCCAGT<br>GCCAAGCTTGCATGCCTGCAGGTCAATTTCGATTTAAGTTGAC<br>CCAACGTCGCCGGCGTGCACAATCTAGATGCTAGGACTCTAGA<br>GGATCCCCGGGTACCGAGCTCGAATTTCGTAATCATGGTCATAG<br>CTGTTTCCTGTGTGAAATTGTTATCCGCTCACAATTCCACACAA<br>CATACGAGCCGGAAGCATAAAGTGTAAGCCTGGGGTGCCTA<br>ATGAGTGAGCTAACTCACATTAATTGCGTTGCGCTCACTGCC<br>GCTTCCAGTCGGGAAACCTGTCGTGCCAGCTGCATTAATGAA<br>TCGGCCAACGCGCGGGGAGAGGCGGTTTGCGTATTGGGCGC<br>TCTTCCGCTTCCTCGC    | S7B&D    |
| dsDNA used for SpCas12f1 mass photometry assay | AAGGAGAAAATACCGCATCAGGCGCCATTCGCCATTCAGGCTG<br>CGCAACTGTTGGGAAGGGCGATCGGTGCGGGCCTCTTCGCTA<br>TTACGCCAGCTGGCGAAAGGGGGATGTGCTGCAAGGCGATTA<br>AGTTGGGTAACGCCAGGGTTTTCCAGTCACGACGTTGTAAAA<br>CGACGGCCAGTGCCAAGCTTGCATGCCTGCAGGTCAATTCCA<br>CGTTAGTTGACCCAACGTCGCCGGCGTGCACAATCTAGATGC<br>TAGGACTCTAGAGGATCCCCGGGTACCGAGCTCGAATTTCGTA<br>TCATGGTCATAGCTGTTTCCTGTGTGAAATTGTTATCCGCTCAC<br>AATTCCACACAACATACGAGCCGGAAGCATAAAGTGTAAGGCC<br>TGGGGTGCCTAATGAGTG | 2E, S10A |
| dsDNA used for AsCas12f1 mass photometry assay | AAGGAGAAAATACCGCATCAGGCGCCATTCGCCATTCAGGCTG<br>CGCAACTGTTGGGAAGGGCGATCGGTGCGGGCCTCTTCGCTA<br>TTACGCCAGCTGGCGAAAGGGGGATGTGCTGCAAGGCGATTA<br>AGTTGGGTAACGCCAGGGTTTTCCAGTCACGACGTTGTAAAA<br>CGACGGCCAGTGCCAAGCTAGTATTTAAGTTGACCCAACGTCG<br>CCGGCGTGCACAATCTAGATGCATAATTCGTAATCATGGTCAT<br>AGCTGTTTCCTGTGTGAAATTGTTATCCGCTCACAATTCCACAC<br>AACATACGAGCCGGAAGCATAAAGTGTAAGCCTGGGGTGC<br>TAATGAGTG                                                          | S10B     |

**Supplementary Table 5 | Primers used in assessing human and maize cell editing.** Blue font represents the sequence required for Illumina sequencing, green font shows the additional sequence included to ensure balanced read composition in initial rounds of Illumina sequencing and black font indicates the sequence responsible for annealing to the genomic locus.

| Description                                         | Designation within set | Sequence 5'-3'                             |
|-----------------------------------------------------|------------------------|--------------------------------------------|
| Primary PCR VEGFA3 (SpCas12f1, AsCas12f1, AsCas12a) | NGS-F1                 | ATCGGGAAGCTGAAGATCTGCGTTTGGGAGGTCAGAAATA   |
|                                                     | NGS-F2                 | ATCGGGAAGCTGAAGGCTCTAGTTTGGGAGGTCAGAAATA   |
|                                                     | NGS-F3                 | ATCGGGAAGCTGAAGCGAGATGTTTGGGAGGTCAGAAATA   |
|                                                     | NGS-F4                 | ATCGGGAAGCTGAAGTAGACGGTTTGGGAGGTCAGAAATA   |
|                                                     | NGS-R                  | ATCCGACGGTAGTGTGACGTCCTCACTCTCGAAG         |
| Primary PCR DNMT1 (SpCas12f1)                       | NGS-F1                 | ATCGGGAAGCTGAAGATCTGCCTCAAGTGAGCAGCTGAG    |
|                                                     | NGS-F2                 | ATCGGGAAGCTGAAGGCTCTACTCAAGTGAGCAGCTGAG    |
|                                                     | NGS-F3                 | ATCGGGAAGCTGAAGCGAGATCTCAAGTGAGCAGCTGAG    |
|                                                     | NGS-F4                 | ATCGGGAAGCTGAAGTAGACGNCTCAAGTGAGCAGCTGAG   |
|                                                     | NGS-R                  | ATCCGACGGTAGTGTGTGTGAGGATTGAGTGAGTT        |
| Primary PCR DNMT1 (AsCas12f1, AsCas12a)             | NGS-F1                 | ATCGGGAAGCTGAAGATCTGCTGAACACTCCTCAAACGGTC  |
|                                                     | NGS-F2                 | ATCGGGAAGCTGAAGGCTCTATGAACACTCCTCAAACGGTC  |
|                                                     | NGS-F3                 | ATCGGGAAGCTGAAGCGAGATTGAACACTCCTCAAACGGTC  |
|                                                     | NGS-F4                 | ATCGGGAAGCTGAAGTAGACGTGAACACTCCTCAAACGGTC  |
|                                                     | NGS-R                  | ATCCGACGGTAGTGTGCCCTCACTCCTGCTCGGT         |
| Primary PCR AGL1 (SpCas12f1)                        | NGS-F1                 | ATCGGGAAGCTGAAGATCTGCGTTGACAATAACACAACAGG  |
|                                                     | NGS-F2                 | ATCGGGAAGCTGAAGGCTCTAGTTGACAATAACACAACAGG  |
|                                                     | NGS-F3                 | ATCGGGAAGCTGAAGCGAGATGTTGACAATAACACAACAGG  |
|                                                     | NGS-F4                 | ATCGGGAAGCTGAAGTAGACGGTTGACAATAACACAACAGG  |
|                                                     | NGS-R                  | ATCCGACGGTAGTGTGCCTTAAGGAAACAGAAGAG        |
| Primary PCR VEGFA2 (SpCas12f1)                      | NGS-F1                 | ATCGGGAAGCTGAAGATCTGCAGCTACCACCTCCTCCCCGGC |
|                                                     | NGS-F2                 | ATCGGGAAGCTGAAGGCTCTAAGCTACCACCTCCTCCCCGGC |
|                                                     | NGS-F3                 | ATCGGGAAGCTGAAGCGAGATAGCTACCACCTCCTCCCCGGC |
|                                                     | NGS-F4                 | ATCGGGAAGCTGAAGTAGACGAGCTACCACCTCCTCCCCGGC |
|                                                     | NGS-R                  | ATCCGACGGTAGTGTGCGGCTCCTCCGAAGCGAGAAC      |

|                                                                                                              |        |                                                                |
|--------------------------------------------------------------------------------------------------------------|--------|----------------------------------------------------------------|
| Primary PCR VEGFA2 (AsCas12f1 and AsCas12a)                                                                  | NGS-F1 | ATCGGGAAGCTGAAGATCTGCGGGCGTGCGAGCAGCGAAAG                      |
|                                                                                                              | NGS-F2 | ATCGGGAAGCTGAAGGCTCTAGGGCGTGCGAGCAGCGAAAG                      |
|                                                                                                              | NGS-F3 | ATCGGGAAGCTGAAGCGAGATGGGCGTGCGAGCAGCGAAAG                      |
|                                                                                                              | NGS-F4 | ATCGGGAAGCTGAAGTAGACGGGGCGTGCGAGCAGCGAAAG                      |
|                                                                                                              | NGS-R  | ATCCGACGGTAGTGTGTGTCCTCGTCAGCGCGACTGGT                         |
| Primary PCR FANCF (SpCas12f1)                                                                                | NGS-F1 | ATCGGGAAGCTGAAGATCTGCGCTACCTGCGCCACATCCA                       |
|                                                                                                              | NGS-F2 | ATCGGGAAGCTGAAGGCTCTAGCTACCTGCGCCACATCCA                       |
|                                                                                                              | NGS-F3 | ATCGGGAAGCTGAAGCGAGATGCTACCTGCGCCACATCCA                       |
|                                                                                                              | NGS-F4 | ATCGGGAAGCTGAAGTAGACGGCTACCTGCGCCACATCCA                       |
|                                                                                                              | NGS-R  | ATCCGACGGTAGTGTGACCGAGGGCCTGGAAGTTC                            |
| Primary PCR EMX1 (SpCas12f1)                                                                                 | NGS-F1 | ATCGGGAAGCTGAAGATCTGCGCTCAGCCTGAGTGTTGAGGC                     |
|                                                                                                              | NGS-F2 | ATCGGGAAGCTGAAGGCTCTAGCTCAGCCTGAGTGTTGAGGC                     |
|                                                                                                              | NGS-F3 | ATCGGGAAGCTGAAGCGAGATGCTCAGCCTGAGTGTTGAGGC                     |
|                                                                                                              | NGS-F4 | ATCGGGAAGCTGAAGTAGACGGCTCAGCCTGAGTGTTGAGGC                     |
|                                                                                                              | NGS-R  | ATCCGACGGTAGTGTGTGGCCTGCTTCGTGGCAAT                            |
| Primary PCR ms26 (SpCas12f1 and SpCas9)                                                                      | NGS-F1 | ATCGGGAAGCTGAAGATCTGCCGACGCGGCGAGCTTCCG                        |
|                                                                                                              | NGS-F2 | ATCGGGAAGCTGAAGGCTCTACGACGCGGCGAGCTTCCG                        |
|                                                                                                              | NGS-F3 | ATCGGGAAGCTGAAGCGAGATCGACGCGGCGAGCTTCCG                        |
|                                                                                                              | NGS-F4 | ATCGGGAAGCTGAAGTAGACGGCGACGCGGCGAGCTTCCG                       |
|                                                                                                              | NGS-R  | ATCCGACGGTAGTGTTCATGCGGTAAGTGCACCGGGT                          |
| Primary PCR waxy (SpCas12f1 and SpCas9)                                                                      | NGS-F1 | ATCGGGAAGCTGAAGATCTGCGACGTCGTGTTCTGTCTGCAAC                    |
|                                                                                                              | NGS-F2 | ATCGGGAAGCTGAAGGCTCTAGACGTCGTGTTCTGTCTGCAAC                    |
|                                                                                                              | NGS-F3 | ATCGGGAAGCTGAAGCGAGATGACGTCGTGTTCTGTCTGCAAC                    |
|                                                                                                              | NGS-F4 | ATCGGGAAGCTGAAGTAGACGGACGTCGTGTTCTGTCTGCAAC                    |
|                                                                                                              | NGS-R  | ATCCGACGGTAGTGTCTGTTAGGTAGTACGTGAAGATGGT                       |
| Universal secondary PCR forward primer                                                                       |        | AATGATACGGCGACCACCGAGATCTACACATACGAGATCCGTA<br>ATCGGGAAGCTGAAG |
| Universal secondary PCR reverse primer ("N" indicates variable 8 bp index sequence for sample deconvolution) |        | CAAGCAGAAGACGGCATAACGAGATNNNNNNNNACACGCACGA<br>TCCGACGGTAGTGT  |
| Amplicon sequencing primer                                                                                   |        | CATACGAGATCCGTAATCGGGAAGCTGAAG                                 |



Index sequencing primer

ACACTACCGTCGGATCGTGCGTGT

**Supplementary Table 6 | gRNA targets used in human and maize cell editing.**

| Protein                                  | Target Name     | Target sequence (5'-3') |
|------------------------------------------|-----------------|-------------------------|
| <b>For genome editing in human cells</b> |                 |                         |
| AsCas12a                                 | Non-target (NT) | AGTTGACCCAACGTCGCCGGCGT |
|                                          | VEGFA3          | GCCAGAGCCGGGGTGTGCAGACG |
|                                          | VEGFA2          | AGTGCGACGCCGCGAGCCCCGAC |
|                                          | DNMT1           | GCTCAGCAGGCACCTGCCTCAGC |
| AsCas12f1                                | Non-target (NT) | AGTTGACCCAACGTCGCCGG    |
|                                          | VEGFA3          | GCCAGAGCCGGGGTGTGCAG    |
|                                          | VEGFA2          | GGGGTGACCGCCGGAGCGCG    |
|                                          | DNMT1           | GCTCAGCAGGCACCTGCCTC    |
| SpCas12f1                                | Non-target (NT) | AGTTGACCCAACGTCGCCGG    |
|                                          | VEGFA3          | CCTCTTTAGCCAGAGCCGGG    |
|                                          | VEGFA2          | AGTGCGACGCCGCGAGCCCC    |
|                                          | DNMT1           | CCTCACTCCTGCTCGGTGAA    |
| <b>For genome editing in maize cells</b> |                 |                         |
| SpCas12f1                                | <i>ms26</i>     | AAGTTCACGGCGTTCCAGGC    |
|                                          | <i>waxy</i>     | AGTTCAGAGAAGGCAACCTT    |
| SpCas9                                   | <i>ms26</i>     | AAGTTCACGGCGTTCCAGGC    |
|                                          | <i>waxy</i>     | GGCATCTACAGGGACGCAA     |
